# Supplementary material for: Water-Soluble Chalcogenide W6-Clusters: On the Way to Biomedical Applications
Source: MDPI journal article supplement (doi:10.3390/ijms23158734), 2022-08-05
Supplement: s1 [file s1]

# Water-Soluble Chalcogenide W<sub>6</sub>-Clusters: On the Way to Biomedical Applications

Alena D. Gassan <sup>1,2</sup>, Anton A. Ivanov <sup>1</sup>, Tatiana N. Pozmogova <sup>1,2</sup>, Ilia V. Eltsov <sup>2</sup>, Natalia V. Kuratieva <sup>1</sup>, Yuri V. Mironov <sup>1,\*</sup> and Michael A. Shestopalov <sup>1</sup>

<sup>1</sup> Nikolaev Institute of Inorganic Chemistry of Siberian Branch of Russian Academy of Sciences, 3 Acad. Lavrentiev ave., 630090 Novosibirsk, Russia

<sup>2</sup> Department of Natural Sciences, Novosibirsk State University, 1 Pirogova st., 630090 Novosibirsk, Russia

\* Correspondence: yuri@niic.nsc.ru

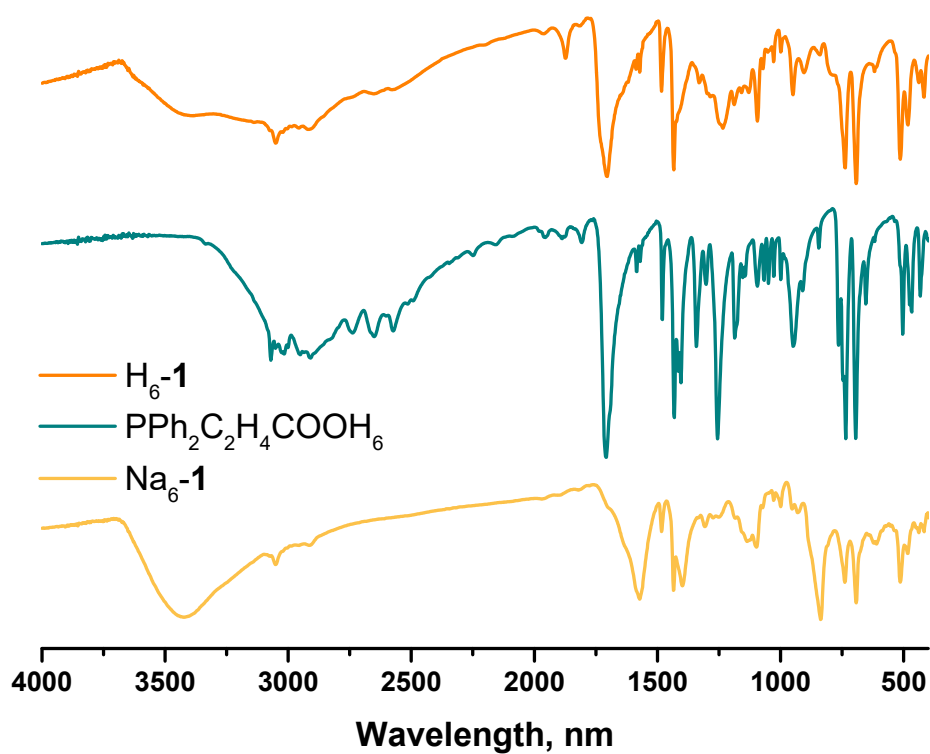

Figure S1. FTIR spectra of H<sub>6</sub>-1, Na<sub>6</sub>-1, in comparison with PPh<sub>2</sub>C<sub>2</sub>H<sub>4</sub>COOH.

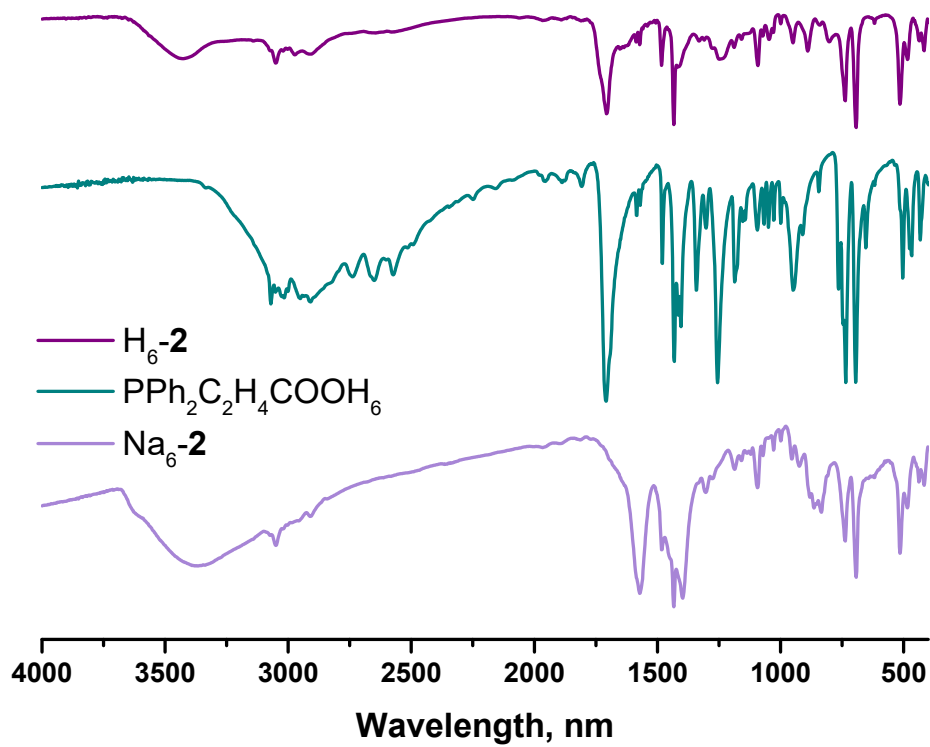

Figure S2. FTIR spectra of H<sub>6</sub>-2, Na<sub>6</sub>-2 in comparison with PPh<sub>2</sub>C<sub>2</sub>H<sub>4</sub>COOH.

**Table S1.** Selected crystallographic parameters of the single-crystal X-ray diffraction structural analysis for H<sub>6</sub>-1·7H<sub>2</sub>O·2.5Et<sub>2</sub>O, H<sub>6</sub>-2·3H<sub>2</sub>O·Et<sub>2</sub>O and Na<sub>6</sub>-1·7.5H<sub>2</sub>O·Me<sub>2</sub>CO

| Compound                                                               | H <sub>6</sub> -1·7H <sub>2</sub> O·2.5Et <sub>2</sub> O                                        | H <sub>6</sub> -2·3H <sub>2</sub> O·Et <sub>2</sub> O                                          | Na <sub>6</sub> -1·7.5H <sub>2</sub> O·Me <sub>2</sub> CO                                                       |
|------------------------------------------------------------------------|-------------------------------------------------------------------------------------------------|------------------------------------------------------------------------------------------------|-----------------------------------------------------------------------------------------------------------------|
| Empirical formula                                                      | C <sub>98</sub> H <sub>124</sub> O <sub>21.5</sub> P <sub>6</sub> S <sub>8</sub> W <sub>6</sub> | C <sub>94</sub> H <sub>100</sub> O <sub>16</sub> P <sub>6</sub> Se <sub>8</sub> W <sub>6</sub> | C <sub>93</sub> H <sub>105</sub> Na <sub>6</sub> O <sub>20.5</sub> P <sub>6</sub> S <sub>8</sub> W <sub>6</sub> |
| Formula weight                                                         | 3191.36                                                                                         | 3406.33                                                                                        | 3234.10                                                                                                         |
| Temperature, K                                                         | 150(2)                                                                                          | 150(2)                                                                                         | 150(2)                                                                                                          |
| Crystal system                                                         | triclinic                                                                                       | triclinic                                                                                      | triclinic                                                                                                       |
| Space group                                                            | $P \bar{1}$                                                                                     | $P \bar{1}$                                                                                    | $P \bar{1}$                                                                                                     |
| $a$ , Å                                                                | 14.2426(2)                                                                                      | 14.3920(4)                                                                                     | 14.1628(11)                                                                                                     |
| $b$ , Å                                                                | 15.2223(3)                                                                                      | 15.2716(4)                                                                                     | 15.2892(11)                                                                                                     |
| $c$ , Å                                                                | 17.0620(3)                                                                                      | 17.2025(5)                                                                                     | 17.1646(13)                                                                                                     |
| $\alpha$ , °                                                           | 98.507(1)                                                                                       | 96.687(1)                                                                                      | 76.380(2)                                                                                                       |
| $\beta$ , °                                                            | 108.605(1)                                                                                      | 110.668(1)                                                                                     | 72.995(2)                                                                                                       |
| $\gamma$ , °                                                           | 114.885(1)                                                                                      | 115.038(1)                                                                                     | 71.046(2)                                                                                                       |
| $V$ , Å <sup>3</sup>                                                   | 3004.13(9)                                                                                      | 3043.49(15)                                                                                    | 3320.8(4)                                                                                                       |
| $Z$                                                                    | 1                                                                                               | 1                                                                                              | 1                                                                                                               |
| $\rho_{\text{calc}}$ , g/cm <sup>3</sup>                               | 1.764                                                                                           | 1.859                                                                                          | 1.617                                                                                                           |
| $\mu$ , mm <sup>-1</sup>                                               | 5.999                                                                                           | 8.168                                                                                          | 5.445                                                                                                           |
| $F(000)$                                                               | 1546                                                                                            | 1598                                                                                           | 1555                                                                                                            |
| Crystal size                                                           | 0.17 × 0.07 × 0.04                                                                              | 0.25 × 0.09 × 0.05                                                                             | 0.30 × 0.16 × 0.01                                                                                              |
| 2 $\Theta$ range for data collection, °                                | 2.363 – 27.572                                                                                  | 2.304 – 27.234                                                                                 | 1.761 – 26.692                                                                                                  |
| Index ranges                                                           | −18 ≤ $h$ ≤ 18                                                                                  | −18 ≤ $h$ ≤ 18                                                                                 | −17 ≤ $h$ ≤ 17                                                                                                  |
|                                                                        | −19 ≤ $k$ ≤ 19                                                                                  | −19 ≤ $k$ ≤ 19                                                                                 | −19 ≤ $k$ ≤ 19                                                                                                  |
|                                                                        | −22 ≤ $l$ ≤ 21                                                                                  | −22 ≤ $l$ ≤ 21                                                                                 | −18 ≤ $l$ ≤ 21                                                                                                  |
| Reflections collected                                                  | 28904                                                                                           | 27490                                                                                          | 27675                                                                                                           |
| Independent reflections;<br>[ $R_{\text{int}}$ ]                       | 13774; [0.0441]                                                                                 | 13480; [0.0357]                                                                                | 13729; [0.0459]                                                                                                 |
| Parameters refined                                                     | 701                                                                                             | 641                                                                                            | 639                                                                                                             |
| Goodness-of-fit on $F^2$                                               | 1.031                                                                                           | 1.049                                                                                          | 1.094                                                                                                           |
| $R_1$ / $wR_2$ ( $I > 2\sigma(I)$ )                                    | 0.0417 / 0.0920                                                                                 | 0.0392 / 0.1125                                                                                | 0.0618 / 0.1718                                                                                                 |
| $R_1$ / $wR_1$ (all data)                                              | 0.0622 / 0.0975                                                                                 | 0.0653 / 0.1218                                                                                | 0.1004 / 0.1877                                                                                                 |
| $\Delta\rho_{\text{max}}/\Delta\rho_{\text{min}}$ (e·Å <sup>-3</sup> ) | 1.583 / −1.176                                                                                  | 2.618 / −1.171                                                                                 | 6.488 / −2.466                                                                                                  |

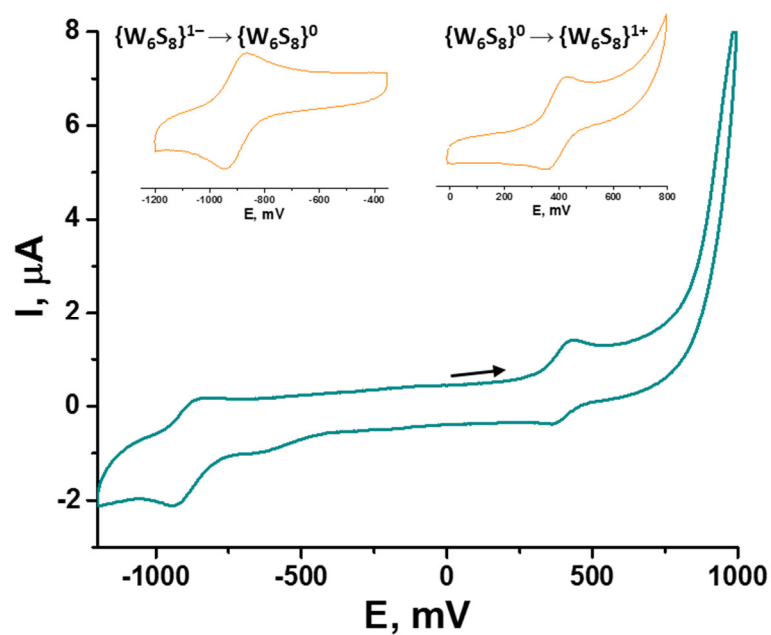

**Figure S3.** Cyclic voltammetry of the H<sub>6</sub>-1 (0.5 mM) in 0.1 M Bu<sub>4</sub>NClO<sub>4</sub> DMSO solution, scan rate – 100 mV/s. Reference electrode – Ag/AgCl/3.5 M KCl.

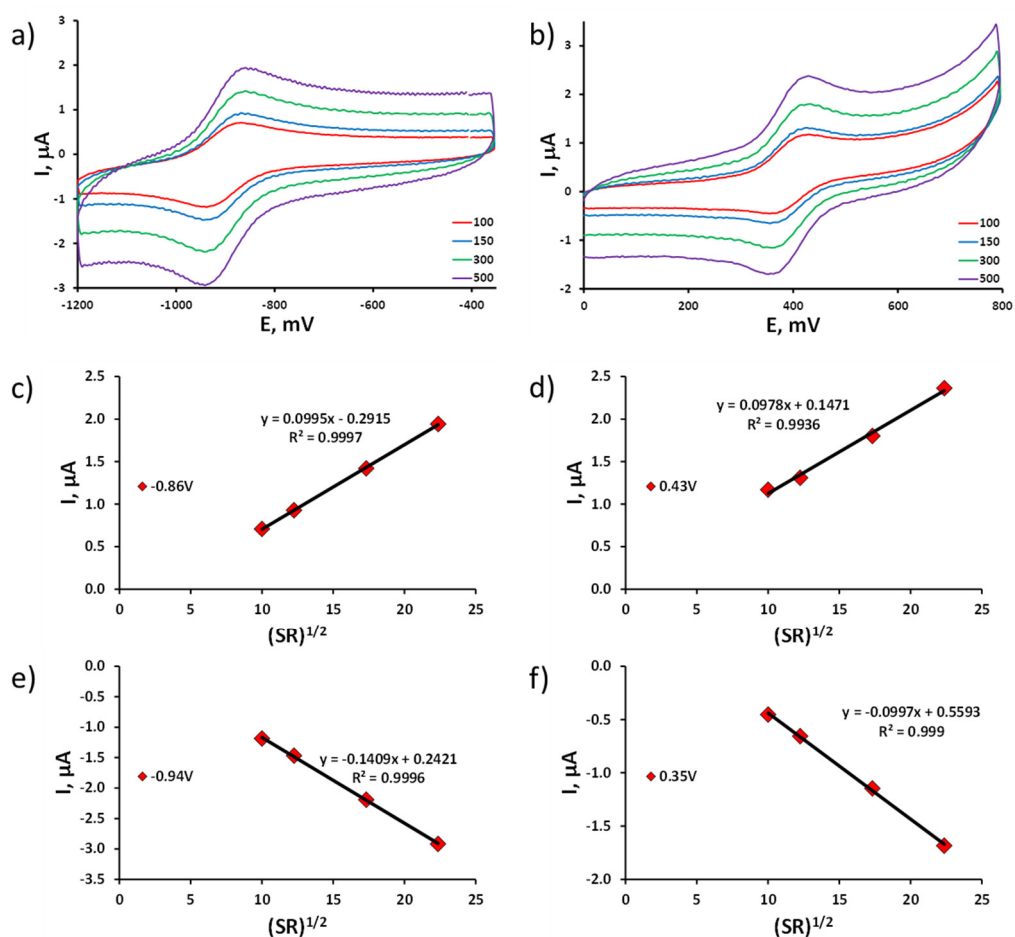

**Figure S4.** Cyclic voltammograms of H<sub>6</sub>-1 at various scan rate (a,b) and linear dependence of the cathodic (c,d) and anodic (e,f) peak current upon square root of the potential scan rate.

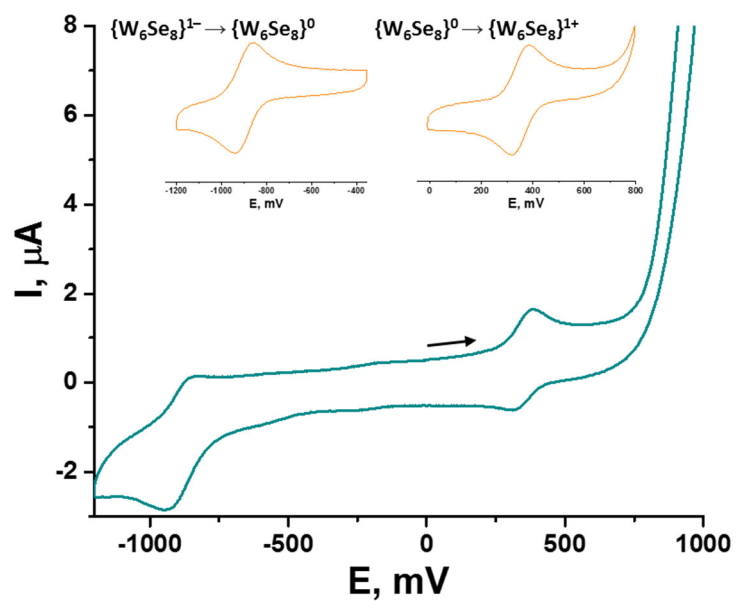

**Figure S5.** Cyclic voltammetry of the H<sub>6</sub>-2 (0.5 mM) in 0.1 M Bu<sub>4</sub>NClO<sub>4</sub> DMSO solution, scan rate – 100 mV/s. Reference electrode – Ag/AgCl/3.5 M KCl.

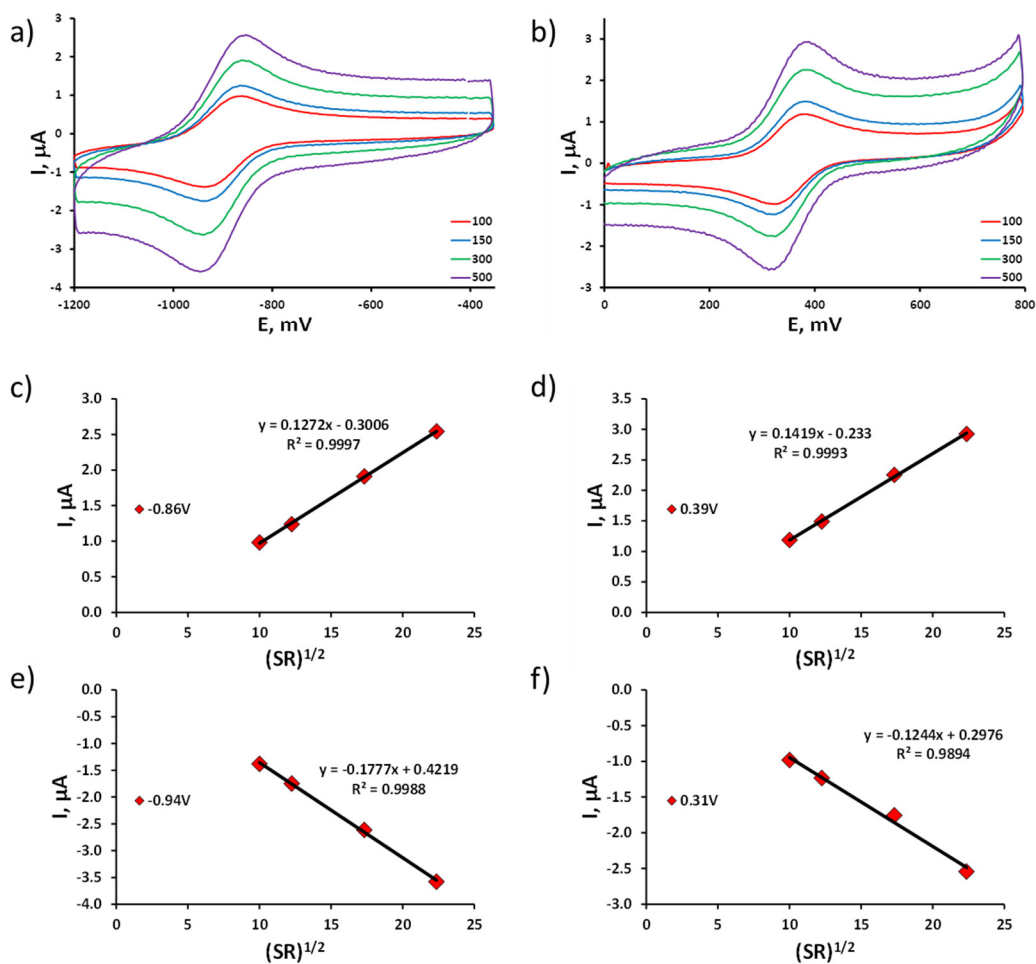

**Figure S6.** Cyclic voltammograms of H<sub>6</sub>-2 at various scan rate (a,b) and linear dependence of the cathodic (c,d) and anodic (e,f) peak current upon square root of the potential scan rate.

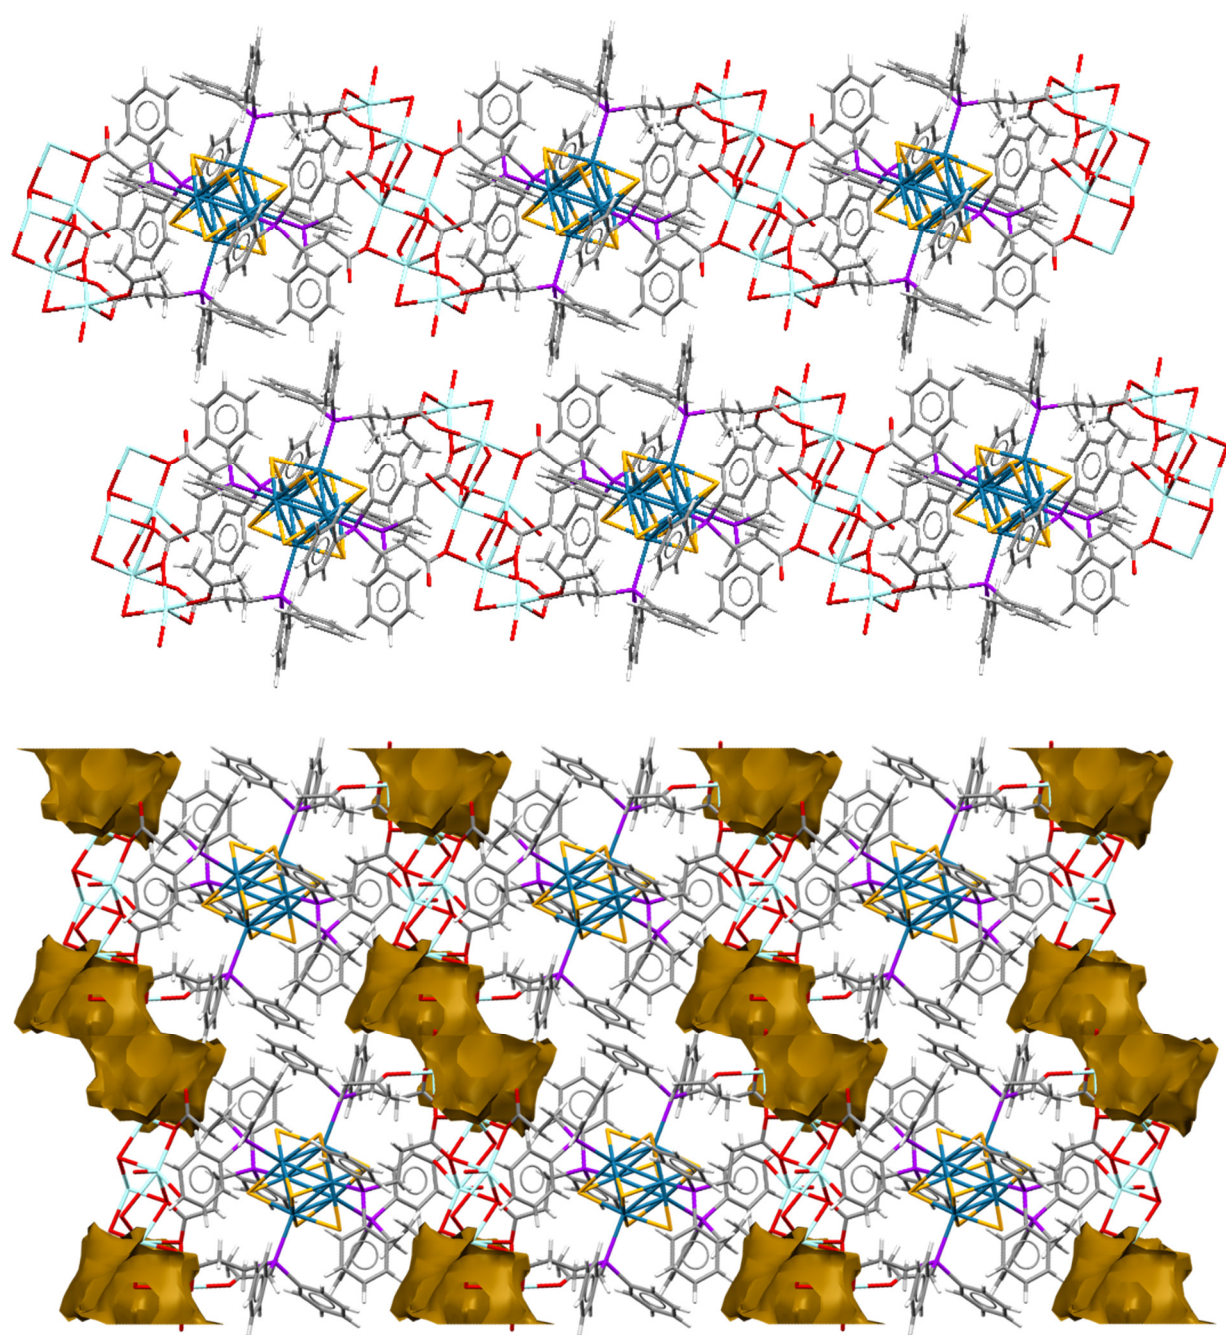

**Figure S7.** Chains -{alkali cations-cluster anions}- in Na<sub>6</sub>-1 crystal structure (top) and shape of the solvent accessible surface of the voids, illustrated along the *a* axis, calculated by the Mercury CSD 2021.3.0 program with default parameters (1.2 Å probe radius, 0.7 Å approximate grind spacing) (bottom).

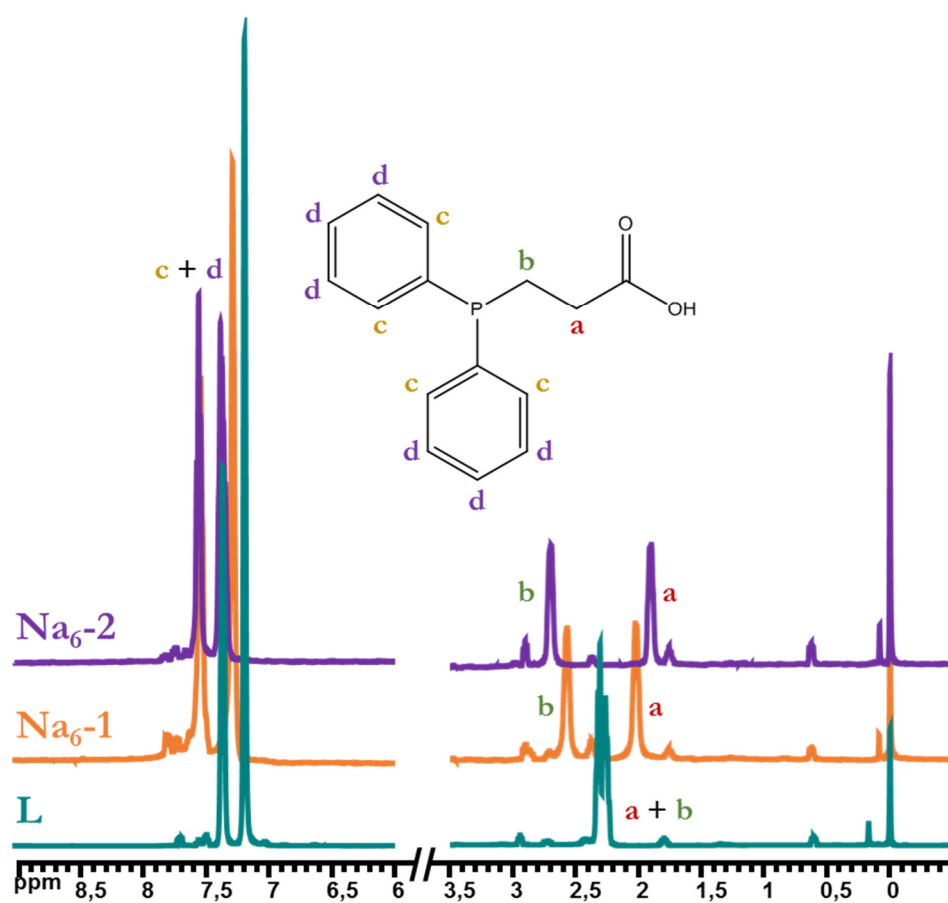

**Figure S8.**  $^1\text{H}$  NMR spectra of Na<sub>6</sub>-1 and Na<sub>6</sub>-2 in D<sub>2</sub>O in comparison with  $\text{PPh}_2\text{C}_2\text{H}_4\text{COOH}$ .

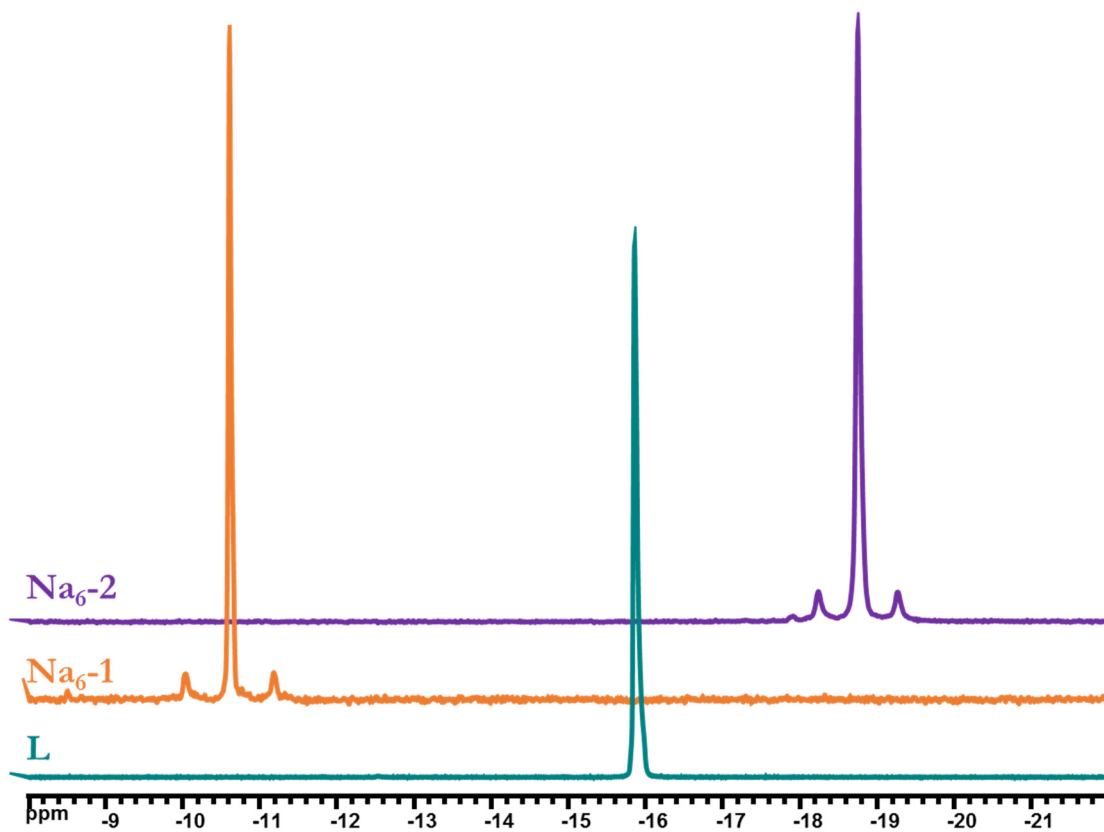

**Figure S9.**  $^{31}\text{P}$  NMR spectra of Na<sub>6</sub>-1 and Na<sub>6</sub>-2 in D<sub>2</sub>O in comparison with  $\text{PPh}_2\text{C}_2\text{H}_4\text{COOH}$ .



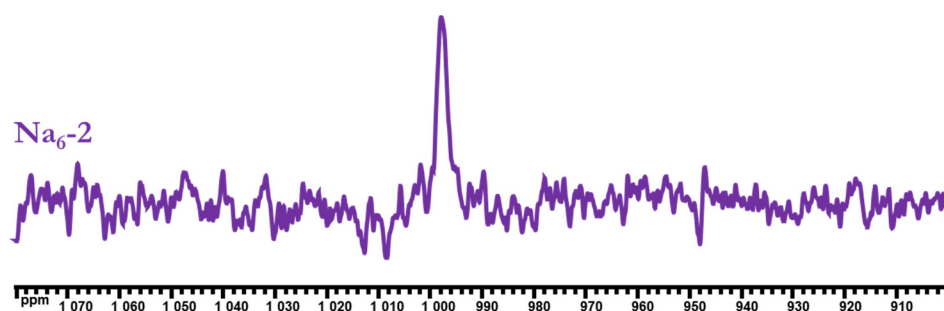

Figure S10.  $^{77}\text{Se}$  NMR spectra Na<sub>6</sub>-2 in D<sub>2</sub>O.

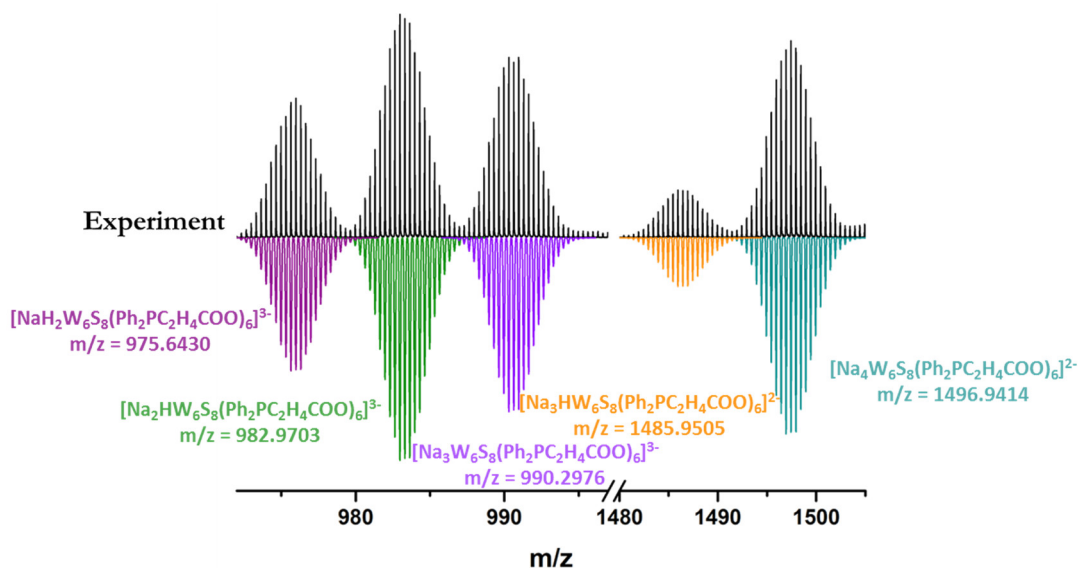

Figure S11. Fragments of mass-spectrum of Na<sub>6</sub>-1 in aqueous solution (black) and simulated profiles of forms (colored).

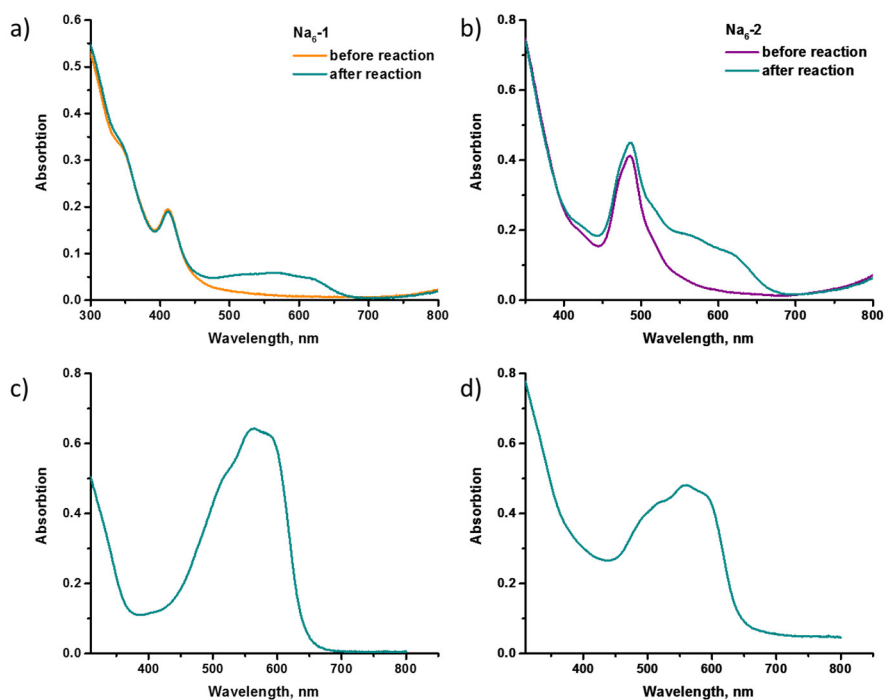

Figure S12. UV/Vis spectra of aqueous solutions of Na<sub>6</sub>-1 (a) and Na<sub>6</sub>-2 (b) after and before reactions with MTT and of violet precipitate after reaction with Na<sub>6</sub>-1 (c) and Na<sub>6</sub>-2 (d) in *i*PrOH.



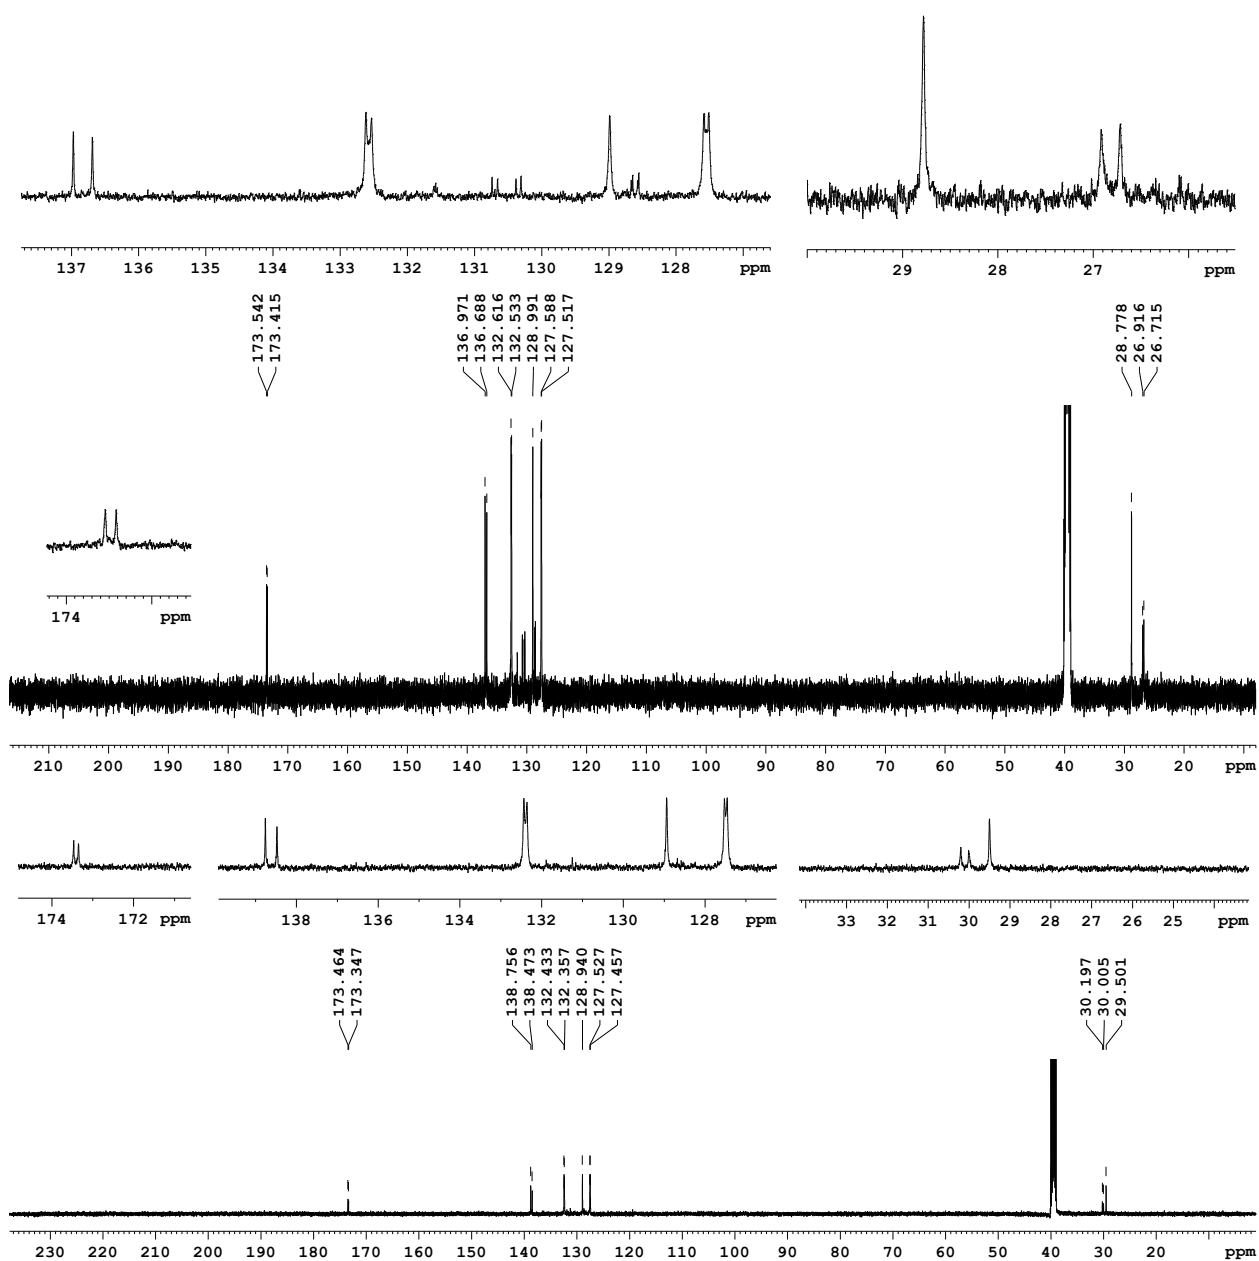

**Figure S13.**  $^{13}\text{C}$  NMR spectrum for H6-1 (top) and H6-2 (bottom) in  $\text{DMSO-d}_6$ .

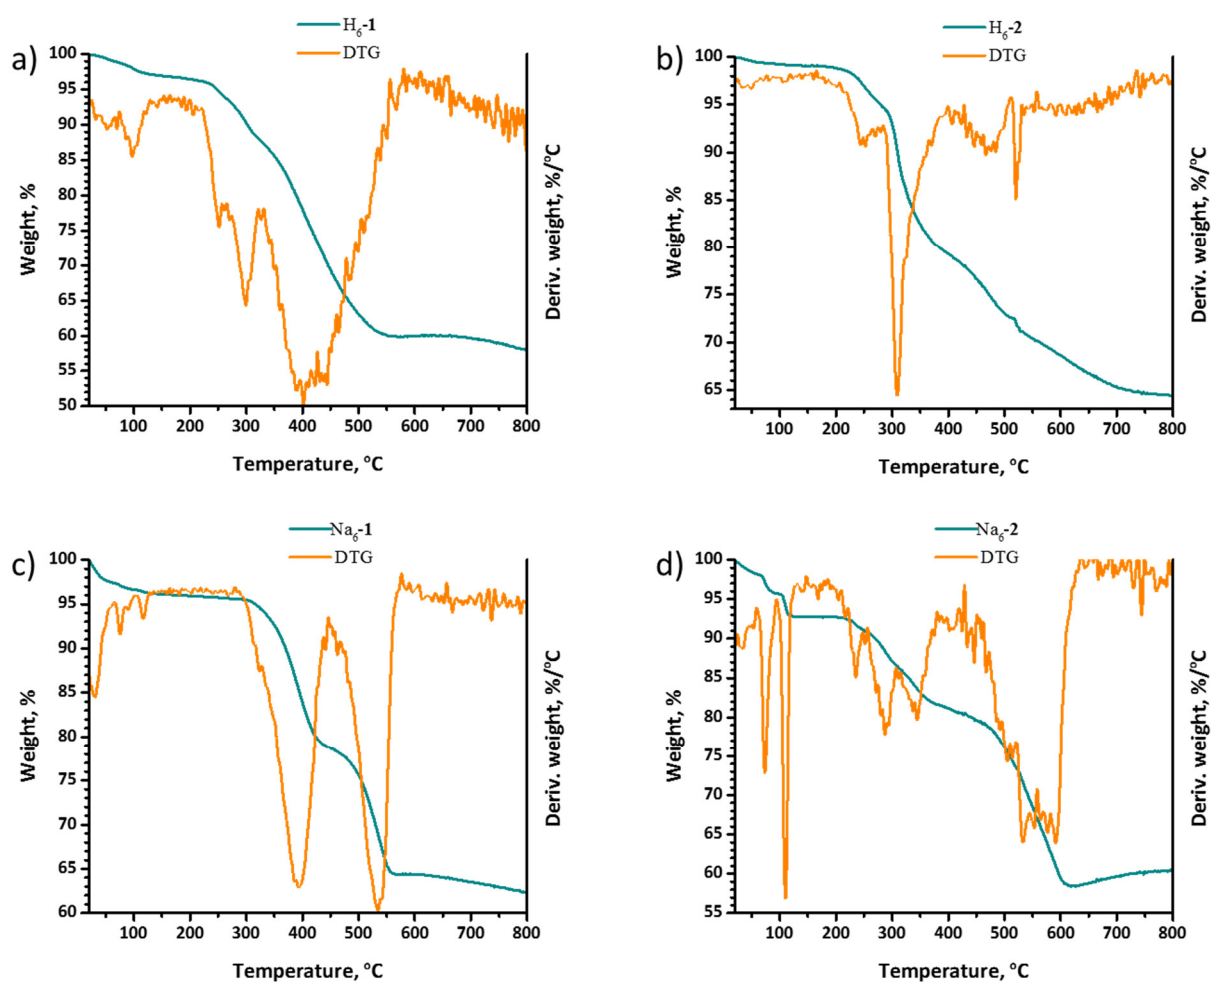

**Figure S14.** TGA and DTG curves for H<sub>6</sub>-1 (a), H<sub>6</sub>-2 (b), Na<sub>6</sub>-1 (c) and Na<sub>6</sub>-2 (d). Heating rate of 10 °C·min<sup>-1</sup>.

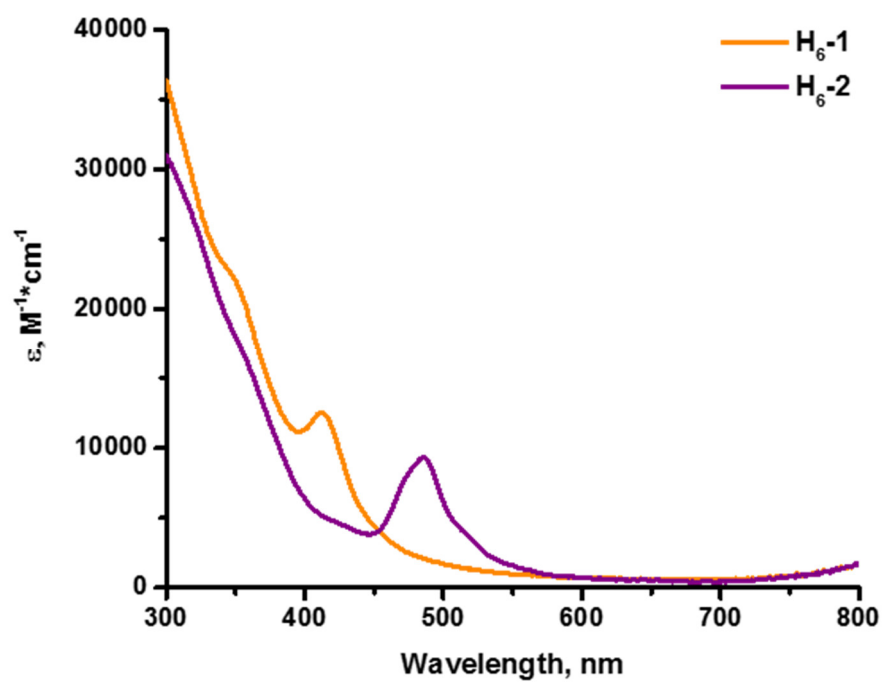

**Figure S15.** UV/Vis spectra of H<sub>6</sub>-1 and H<sub>6</sub>-2 in DMSO.

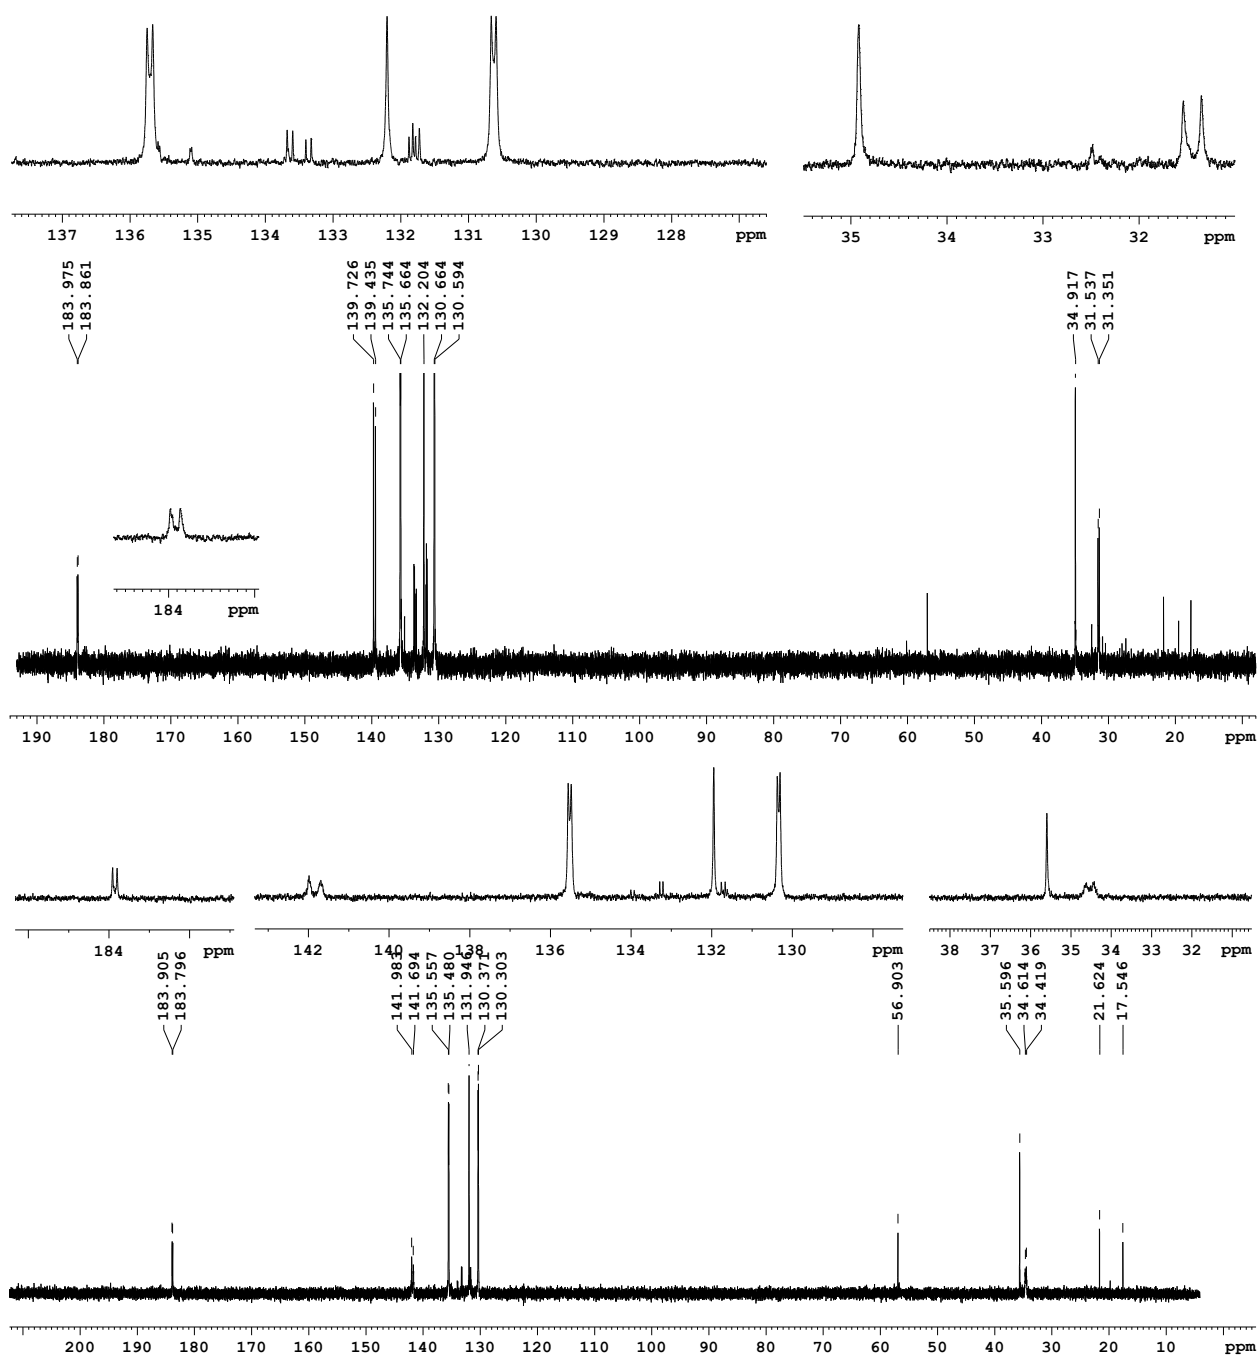

Figure S16.  $^{13}\text{C}$  NMR spectrum for Na<sub>6</sub>-1 (top) and Na<sub>6</sub>-2 (bottom) in D<sub>2</sub>O.
